# Supplementary material for: Association of Radiotherapy Duration With Clinical Outcomes in Patients With Esophageal Cancer Treated in NRG Oncology Trials: A Secondary Analysis of NRG Oncology Randomized Clinical Trials
Source: PubMed Central journal article supplement (PMC10122174; doi:10.1001/jamanetworkopen.2023.8504), 2023-04-21
Supplement: jamanetwopen-e238504-s005.pdf [file jamanetwopen-e238504-s005.pdf]

## Data Sharing Statement

Hallemeier. Association of Radiotherapy Duration With Clinical Outcomes in Patients With Esophageal Cancer Treated in NRG Oncology Trials. *JAMA Netw Open*. Published April 21, 2023. doi:10.1001/jamanetworkopen.2023.8504

### Data

**Data available:** No

### Additional Information

**Explanation for why data not available:** Data will not be published but would be available on request.
